# Supplementary material
Source: MDPI journal article supplement (https://www.mdpi.com/2072-4292/13/20/4054)
Supplement: s1 [file s1]

**Table S1.** Horizontal deformation for the period 1985-1999 (two color EDM data) from [1] and correspondent values obtained from each numerical model (last three columns). Benchmark coordinates are in UTM (NAD27).

| Station                 | X(UTM,m) | Y(UTM,m)  | Z(m) | Baseline Change (m) | Error(m) | Baseline Change HF(m) | Baseline Change HT(m) | Baseline Change HeT(m) |
|-------------------------|----------|-----------|------|---------------------|----------|-----------------------|-----------------------|------------------------|
| CASA (common end point) | 332839.6 | 4167846.4 | 2214 | -                   | -        |                       |                       |                        |
| HOT                     | 339457.6 | 4169286.4 | 2185 | 0.170               | 0.005    | 0.170                 | 0.163                 | 0.179                  |
| KNOL                    | 325849.7 | 4169149.1 | 2454 | 0.172               | 0.005    | 0.216                 | 0.190                 | 0.198                  |
| KRAK                    | 334429.6 | 4175494.2 | 2322 | 0.336               | 0.005    | 0.344                 | 0.329                 | 0.338                  |
| MINE                    | 331169.9 | 4164340.6 | 2677 | 0.016               | 0.005    | 0.118                 | 0.096                 | 0.089                  |
| SHARK                   | 335777.9 | 4166871.7 | 2177 | 0.062               | 0.005    | 0.108                 | 0.106                 | 0.106                  |
| SHER                    | 328480.8 | 4165794.9 | 2622 | 0.087               | 0.005    | 0.156                 | 0.132                 | 0.130                  |
| TILL                    | 335829.4 | 4164989.7 | 2275 | 0.014               | 0.005    | 0.104                 | 0.094                 | 0.089                  |
|                         |          |           |      |                     |          |                       |                       |                        |
| LKT (common end point)  | 328533.8 | 4177331.7 | 2372 | -                   | -        |                       |                       |                        |
| BALD                    | 332747.8 | 4183347.3 | 2476 | 0.049               | 0.005    | 0.036                 | 0.031                 | 0.019                  |
| DEAD                    | 322078.7 | 4177309.2 | 2441 | 0.036               | 0.005    | 0.018                 | 0.012                 | 0.007                  |
| KNOB                    | 326622.4 | 4171597.5 | 2611 | 0.204               | 0.005    | 0.164                 | 0.161                 | 0.169                  |
| KRAK                    | 334429.6 | 4175494.2 | 2322 | 0.178               | 0.005    | 0.161                 | 0.152                 | 0.164                  |
| MIKE                    | 329323.1 | 4169648.8 | 2359 | 0.287               | 0.005    | 0.214                 | 0.200                 | 0.205                  |
| MICR                    | 325638.8 | 4181437.1 | 2449 | -0.014              | 0.005    | -0.060                | -0.060                | -0.075                 |
| SAGE                    | 337410.1 | 4178053.1 | 2160 | 0.179               | 0.005    | 0.198                 | 0.192                 | 0.209                  |

**Table S2.** Vertical deformation (uplift) for the period 1985-1999. Position, elevation and uplift for the selected benchmarks are shown together with GPS heights and GEOID heights ([1]) and corresponding modeling results.

| ID    | X(UTM,m) | Y(UTM,m)  | Elevation 1999 | Uplift(m) | Error±(m) | HF Model | HT Model | HeT Model |
|-------|----------|-----------|----------------|-----------|-----------|----------|----------|-----------|
| C916  | 315132   | 4201661.4 | 2049.515       | 0.007     | 0.044     | -        | -        | -         |
| U123  | 315350   | 4200413   | 2043.348       | -0.002    | 0.044     | -        | -        | -         |
| X123  | 326127.3 | 4178629.4 | 2257.308       | 0.16      | 0.04      | 0.115    | 0.114    | 0.104     |
| B13   | 327780.1 | 4175875   | 2308.958       | 0.137     | 0.056     | 0.186    | 0.186    | 0.182     |
| D916  | 328094.6 | 4174458.6 | 2288.899       | 0.217     | 0.041     | 0.217    | 0.214    | 0.216     |
| 13DOR | 329091.7 | 4172772.8 | 2287.431       | 0.253     | 0.04      | 0.261    | 0.252    | 0.257     |
| 12DOR | 329558.8 | 4171897.3 | 2287.727       | 0.264     | 0.041     | 0.274    | 0.264    | 0.268     |
| W911  | 330131.2 | 4169698.7 | 2219.252       | 0.286     | 0.069     | 0.277    | 0.275    | 0.272     |
| 8DOR  | 339179.7 | 4164855.8 | 2122.068       | 0.168     | 0.044     | 0.144    | 0.141    | 0.123     |
| CONV  | 340248.2 | 4164402.2 | 2127.591       | 0.147     | 0.044     | 0.120    | 0.118    | 0.100     |
| 7DOR  | 340789.5 | 4163159.7 | 2076.208       | 0.141     | 0.045     | 0.100    | 0.101    | 0.081     |
| V911  | 341581.1 | 4162067.9 | 2064.04        | 0.152     | 0.046     | 0.082    | 0.082    | 0.066     |
| U911  | 343683.4 | 4160673.9 | 2085.548       | 0.108     | 0.045     | 0.056    | 0.055    | 0.041     |
| D124  | 344672.2 | 4159700.7 | 2089.511       | 0.128     | 0.047     | 0.046    | 0.045    | 0.033     |
| E124  | 347629.5 | 4158613.7 | 2173.517       | 0.099     | 0.047     | 0.030    | 0.031    | 0.021     |
| F124  | 350192.9 | 4158178.5 | 2111.296       | 0.127     | 0.048     | 0.022    | 0.023    | 0.015     |
| 2JCM  | 328808.7 | 4167628   | 2308.765       | 0.231     | 0.042     | 0.254    | 0.249    | 0.234     |
| 5JCM  | 324333.7 | 4169320.3 | 2481.938       | 0.187     | 0.065     | 0.146    | 0.140    | 0.129     |
| 13JCM | 331087.8 | 4175906.6 | 2241.069       | 0.233     | 0.045     | 0.240    | 0.241    | 0.239     |
| 15JCM | 332778.6 | 4174484.5 | 2301.811       | 0.24      | 0.042     | 0.283    | 0.280    | 0.282     |
| 9PDI  | 333400.2 | 4173817.1 | 2243.568       | 0.268     | 0.046     | 0.291    | 0.288    | 0.294     |
| 11PDI | 333872.8 | 4173197   | 2213.345       | 0.271     | 0.043     | 0.292    | 0.291    | 0.301     |
| 17JCM | 333626.2 | 4171903.2 | 2219.786       | 0.328     | 0.049     | 0.292    | 0.296    | 0.308     |
| 25EGE | 333591.8 | 4171071.4 | 2277.74        | 0.282     | 0.043     | 0.283    | 0.290    | 0.302     |
| 23EGE | 332686.5 | 4171245.1 | 2319.961       | 0.294     | 0.043     | 0.285    | 0.292    | 0.299     |
| 18EGE | 331855   | 4170274   | 2304.352       | 0.329     | 0.048     | 0.276    | 0.284    | 0.285     |
| 16EGE | 331550.1 | 4169603.1 | 2283.818       | 0.335     | 0.073     | 0.280    | 0.287    | 0.282     |
| 14EGE | 331126   | 4169145.5 | 2253.307       | 0.217     | 0.051     | 0.285    | 0.289    | 0.280     |
| MUSE  | 328750.3 | 4178852.1 | 2205.001       | 0.21      | 0.077     | 0.142    | 0.141    | 0.132     |
| E916  | 329965.2 | 4179626.2 | 2205.144       | 0.168     | 0.049     | 0.136    | 0.136    | 0.126     |
| G916  | 333533.7 | 4179120.4 | 2138.989       | 0.157     | 0.044     | 0.154    | 0.154    | 0.147     |
| 24DOR | 336425.1 | 4178685.1 | 2108.16        | 0.102     | 0.043     | 0.140    | 0.138    | 0.135     |
| 39DOR | 340129.9 | 4176536.7 | 2087.447       | 0.072     | 0.044     | 0.117    | 0.113    | 0.112     |
| 41DOR | 340379.8 | 4173956.7 | 2074.088       | 0.126     | 0.044     | 0.134    | 0.131    | 0.133     |
| 43DOR | 340344.2 | 4172114.8 | 2088.266       | 0.11      | 0.044     | 0.144    | 0.140    | 0.144     |
| 45DOR | 340212   | 4170297   | 2102.796       | 0.156     | 0.044     | 0.150    | 0.146    | 0.148     |
| 46DOR | 340780.9 | 4169142.7 | 2099.522       | 0.131     | 0.046     | 0.137    | 0.133    | 0.129     |
| 47DOR | 340417.2 | 4168128.5 | 2112.18        | 0.141     | 0.045     | 0.142    | 0.138    | 0.132     |
| 48DOR | 340225.1 | 4166866.8 | 2102.718       | 0.138     | 0.046     | 0.140    | 0.137    | 0.127     |
| 1JD   | 340232.1 | 4166311.7 | 2104.92        | 0.14      | 0.045     | 0.136    | 0.133    | 0.121     |
| 26JCM | 337626.7 | 4172101.1 | 2133.766       | 0.222     | 0.043     | 0.213    | 0.209    | 0.227     |
| 49DOR | 341431.8 | 4172249.2 | 2094.062       | 0.068     | 0.044     | 0.122    | 0.118    | 0.117     |
| 50DOR | 343685.1 | 4172450.5 | 2056.845       | 0.044     | 0.046     | 0.085    | 0.082    | 0.076     |
| 4JD   | 344662.3 | 4173752.9 | 2054.315       | 0.044     | 0.046     | 0.071    | 0.067    | 0.061     |

**Table S3.** Vertical deformation (uplift) for the period 1982-1999 (leveling data). Benchmarks coordinates in UTM (NAD27). Elevation, uplift and error in meter. Uplift and error from [2] and corresponding modeling results.

| ID      | X(UTM,m)  | Y(UTM,m)   | Elevation | Uplift(m) | Error ±(m) | HF Model | HT Model | HeT Model |
|---------|-----------|------------|-----------|-----------|------------|----------|----------|-----------|
| X123    | 326136.14 | 4178629.24 | 2257      | 0.206     | 0.05       | 0.146    | 0.147    | 0.136     |
| MLEQ03A | 328462.44 | 4177303.91 | 2495      | 0.247     | 0.067      | 0.216    | 0.218    | 0.213     |
| D916    | 328094.57 | 4174458.65 | 2288      | 0.295     | 0.051      | 0.276    | 0.276    | 0.282     |
| Y123    | 328785.78 | 4172912.38 | 2310      | 0.339     | 0.036      | 0.322    | 0.315    | 0.326     |
| 12DOR75 | 329558.81 | 4171897.32 | 2311      | 0.358     | 0.051      | 0.348    | 0.340    | 0.351     |
| MLEQ02  | 330200.44 | 4169630.69 | 2242      | 0.379     | 0.076      | 0.354    | 0.356    | 0.357     |
| FLOW    | 332710.85 | 4166338.21 | 2197      | 0.185     | 0.099      | 0.370    | 0.368    | 0.337     |
| A124RST | 335575.89 | 4166125.4  | 2174      | 0.228     | 0.116      | 0.310    | 0.311    | 0.295     |
| CONVICT | 340248.21 | 4164402.24 | 2127      | 0.163     | 0.057      | 0.152    | 0.152    | 0.131     |
| 6DOR75  | 342544.68 | 4161183.78 | 2109      | 0.115     | 0.062      | 0.086    | 0.085    | 0.066     |
| D124    | 344672.23 | 4159700.73 | 2089      | 0.099     | 0.061      | 0.058    | 0.058    | 0.043     |
| E124    | 347595.03 | 4158658.68 | 2197      | 0.051     | 0.062      | 0.038    | 0.040    | 0.027     |
| MLEQB1  | 350322.53 | 4158509.15 | 2135      | 0.084     | 0.063      | 0.028    | 0.030    | 0.019     |
| E916    | 329965.18 | 4179626.16 | 2228      | 0.223     | 0.058      | 0.173    | 0.175    | 0.164     |
| 24DOR75 | 336407.05 | 4178663.26 | 2150      | 0.155     | 0.055      | 0.178    | 0.178    | 0.177     |
| 39DOR75 | 340137.81 | 4176492.17 | 2109      | 0.114     | 0.056      | 0.149    | 0.147    | 0.146     |
| 2JD1952 | 340271.97 | 4170662.09 | 2122      | 0.187     | 0.043      | 0.189    | 0.187    | 0.192     |
| MLEQ01  | 340381.9  | 4168129.2  | 2132      | 0.179     | 0.059      | 0.181    | 0.179    | 0.174     |
| 1JD1952 | 340232.08 | 4166311.72 | 2112      | 0.167     | 0.06       | 0.173    | 0.172    | 0.158     |
| 12JCM82 | 330078.01 | 4175261.24 | 2264      | 0.31      | 0.055      | 0.310    | 0.316    | 0.319     |
| 15JCM82 | 332778.6  | 4174484.55 | 2318      | 0.322     | 0.054      | 0.360    | 0.360    | 0.368     |
| 16JCM82 | 333520.47 | 4173659.22 | 2236      | 0.356     | 0.027      | 0.371    | 0.373    | 0.387     |
| 17JCM82 | 333626.24 | 4171903.23 | 2256      | 0.423     | 0.06       | 0.371    | 0.382    | 0.403     |
| 22JCM82 | 332215.26 | 4171065.92 | 2339      | 0.415     | 0.028      | 0.359    | 0.373    | 0.385     |
| 23JCM82 | 331824.28 | 4170063.72 | 2338      | 0.458     | 0.006      | 0.351    | 0.367    | 0.372     |
| 25JCM82 | 336091.36 | 4172531.07 | 2157      | 0.316     | 0.072      | 0.319    | 0.322    | 0.353     |
| 3JD1952 | 342363.47 | 4172531.1  | 2080      | 0.097     | 0.05       | 0.133    | 0.129    | 0.127     |
| 4JD1952 | 344644.06 | 4173719.96 | 2054      | 0.069     | 0.061      | 0.091    | 0.087    | 0.081     |
| 5JCM82  | 324333.68 | 4169320.3  | 2482      | 0.238     | 0.074      | 0.186    | 0.180    | 0.169     |
| 3JCM82  | 327207.4  | 4168305.09 | 2373      | 0.299     | 0.074      | 0.274    | 0.271    | 0.263     |
| 2JCM82  | 328808.72 | 4167627.96 | 2309      | 0.305     | 0.053      | 0.323    | 0.320    | 0.306     |
| HOT     | 337854.09 | 4168400.36 | 2169      | 0.277     | 0.084      | 0.263    | 0.264    | 0.273     |
| MLEQ05  | 328744.7  | 4181127.85 | 2290      | 0.199     | 0.075      | 0.130    | 0.130    | 0.118     |
| MLEQ14  | 329228.97 | 4166176.19 | 2315      | 0.272     | 0.091      | 0.314    | 0.305    | 0.277     |

**Table S4.** Measured gravity changes (previously corrected for the water table effect), free-air effect and gravity changes corrected for the free-air effect, for the period 1982-1999. Error is 1 standard deviation. Benchmarks positions are in UTM, altitude in m, gravity change in  $\mu\text{Gal}$ . Original dataset in [2].

|                              | X[UTM]   | Y[UTM]  | Altitude (a.s.l.) |  | Measured Gravity change |   |    | Free-air effect |   |    | Measured gravity-Free-air eff. |   |    |
|------------------------------|----------|---------|-------------------|--|-------------------------|---|----|-----------------|---|----|--------------------------------|---|----|
| HW 395                       |          |         |                   |  |                         |   |    |                 |   |    |                                |   |    |
| X123                         | 326136.1 | 4178629 | 2257              |  | -46                     | ± | 9  | -64             | ± | 15 | 18                             | ± | 18 |
| MLEQ03A                      | 328462.4 | 4177304 | 2495              |  | -86                     | ± | 13 | -76             | ± | 21 | -10                            | ± | 24 |
| D916                         | 328094.6 | 4174459 | 2288              |  | -44                     | ± | 19 | -91             | ± | 16 | 47                             | ± | 25 |
| Y123                         | 328785.8 | 4172912 | 2310              |  | -56                     | ± | 17 | -105            | ± | 11 | 48                             | ± | 20 |
| 12DOR75                      | 329558.8 | 4171897 | 2311              |  | -119                    | ± | 21 | -111            | ± | 16 | -9                             | ± | 27 |
| MLEQ02                       | 330200.4 | 4169631 | 2242              |  | -111                    | ± | 9  | -117            | ± | 24 | 6                              | ± | 25 |
| FLOW                         | 332710.9 | 4166338 | 2197              |  | -73                     | ± | 9  | -57             | ± | 31 | -16                            | ± | 32 |
| A124RST                      | 335575.9 | 4166125 | 2174              |  | -15                     | ± | 20 | -70             | ± | 36 | 55                             | ± | 41 |
| CONVICT                      | 340248.2 | 4164402 | 2127              |  | -65                     | ± | 6  | -50             | ± | 17 | -15                            | ± | 19 |
| 6DOR75                       | 342544.7 | 4161184 | 2109              |  | -27                     | ± | 14 | -36             | ± | 19 | 8                              | ± | 23 |
| D124                         | 344672.2 | 4159701 | 2089              |  | -46                     | ± | 12 | -31             | ± | 19 | -16                            | ± | 22 |
| E124                         | 347595   | 4158659 | 2197              |  | -21                     | ± | 5  | -16             | ± | 19 | -6                             | ± | 20 |
| MLEQB1                       | 350322.5 | 4158509 | 2135              |  | -7                      | ± | 5  | -26             | ± | 20 | 19                             | ± | 20 |
| BIG LOOP                     |          |         |                   |  |                         |   |    |                 |   |    |                                |   |    |
| E916                         | 329965.2 | 4179626 | 2228              |  | -62                     | ± | 8  | -69             | ± | 18 | 7                              | ± | 20 |
| 24DOR75                      | 336407.1 | 4178663 | 2150              |  | -70                     | ± | 12 | -48             | ± | 17 | -23                            | ± | 20 |
| 39DOR75                      | 340137.8 | 4176492 | 2109              |  | -46                     | ± | 15 | -35             | ± | 17 | -10                            | ± | 23 |
| 2JD1952                      | 340272   | 4170662 | 2122              |  | -24                     | ± | 11 | -58             | ± | 13 | 34                             | ± | 17 |
| MLEQ01                       | 340381.9 | 4168129 | 2132              |  | -37                     | ± | 7  | -55             | ± | 18 | 19                             | ± | 19 |
| 1JD1952                      | 340232.1 | 4166312 | 2112              |  | -53                     | ± | 12 | -52             | ± | 18 | -1                             | ± | 22 |
| SMALL LOOP                   |          |         |                   |  |                         |   |    |                 |   |    |                                |   |    |
| 12JCM82                      | 330078   | 4175261 | 2264              |  | -85                     | ± | 6  | -96             | ± | 17 | 10                             | ± | 18 |
| 15JCM82                      | 332778.6 | 4174485 | 2318              |  | -80                     | ± | 6  | -100            | ± | 17 | 19                             | ± | 18 |
| 16JCM82                      | 333520.5 | 4173659 | 2236              |  | -87                     | ± | 5  | -110            | ± | 8  | 23                             | ± | 10 |
| 17JCM82                      | 333626.2 | 4171903 | 2256              |  | -71                     | ± | 6  | -131            | ± | 19 | 59                             | ± | 19 |
| 22JCM82                      | 332215.3 | 4171066 | 2339              |  | -79                     | ± | 7  | -128            | ± | 9  | 49                             | ± | 11 |
| 23JCM82                      | 331824.3 | 4170064 | 2338              |  | -92                     | ± | 8  | -141            | ± | 2  | 50                             | ± | 8  |
| ANTELOPE VALLEY RD           |          |         |                   |  |                         |   |    |                 |   |    |                                |   |    |
| 25JCM82                      | 336091.4 | 4172531 | 2157              |  | -106                    | ± | 7  | -97             | ± | 22 | -8                             | ± | 23 |
| BENTON CROSSING              |          |         |                   |  |                         |   |    |                 |   |    |                                |   |    |
| 3JD1952                      | 342363.5 | 4172531 | 2080              |  | -33                     | ± | 12 | -30             | ± | 15 | -3                             | ± | 20 |
| 4JD1952                      | 344644.1 | 4173720 | 2054              |  | -19                     | ± | 18 | -21             | ± | 19 | 2                              | ± | 26 |
| HW 203                       |          |         |                   |  |                         |   |    |                 |   |    |                                |   |    |
| 5JCM82                       | 324333.7 | 4169320 | 2482              |  | -9                      | ± | 24 | -73             | ± | 23 | 64                             | ± | 33 |
| 3JCM82                       | 327207.4 | 4168305 | 2373              |  | -41                     | ± | 22 | -92             | ± | 23 | 51                             | ± | 31 |
| 2JCM82                       | 328808.7 | 4167628 | 2309              |  | -61                     | ± | 31 | -94             | ± | 16 | 33                             | ± | 35 |
| MORE STATIONS WITH ALTERNATE |          |         |                   |  |                         |   |    |                 |   |    |                                |   |    |
| HOT                          | 337854.1 | 4168400 | 2169              |  | -67                     | ± | 7  | -86             | ± | 26 | 18                             | ± | 27 |
| MLEQ05                       | 328744.7 | 4181128 | 2290              |  | -24                     | ± | 6  | -61             | ± | 23 | 37                             | ± | 24 |
| MLEQ14                       | 329229   | 4166176 | 2315              |  | -97                     | ± | 11 | -84             | ± | 28 | -13                            | ± | 30 |
| CONTROL STATIONS             |          |         |                   |  |                         |   |    |                 |   |    |                                |   |    |
| MLEQ06                       | 309973.6 | 4200270 | 2255              |  | -4                      | ± | 6  |                 |   |    |                                |   |    |
| MLEQ11                       | 346515.8 | 4146614 | 2972              |  | -8                      | ± | 6  |                 |   |    |                                |   |    |
| MLEQ13                       | 358851.1 | 4167982 | 2171              |  | -1                      | ± | 5  |                 |   |    |                                |   |    |

## References

1. M. Battaglia, P. Segall, J. Murray, P. Cervelli, and J. Langbein, 2003a. The mechanics of unrest at Long Valley caldera, California: 1. Modeling the geometry of the source using GPS, leveling and 2-color EDM data. J. Volcanol. Geotherm. Res. doi:10.1016/S0377-0273(03)00170-7
2. Battaglia, M., Segall, P. and Roberts, C., 2003b. The mechanics of unrest at Long Valley caldera, California: 2. Constraining the nature of the source using geodetic and micro-gravity data, J. Volcan. Geotherm. Res., 127, 219-245. doi:10.1016/S0377-0273(03)00171-9
